# Supplementary material
Source: PubMed Central journal article supplement (PMC4639978)
Supplement: JCI82152sd.pdf [file JCI82152sd.pdf]

## **SUPPLEMENTAL INFORMATION FOR**

### **LKB1 loss promotes endometrial cancer progression via CCL2-dependent recruitment of macrophages**

Christopher G. Peña, Yuji Nakada, Hatice D. Saatcioglu, Gina M. Aloisio, Ileana Cuevas, Song Zhang, David S. Miller, Jayanthi S. Lea, Kwok-Kin Wong, Ralph J. DeBerardinis, Anthony L. Amelio, Rolf A. Brekken, and Diego H. Castrillon

**Figures S1-6, Tables S2-S3, and Legends**

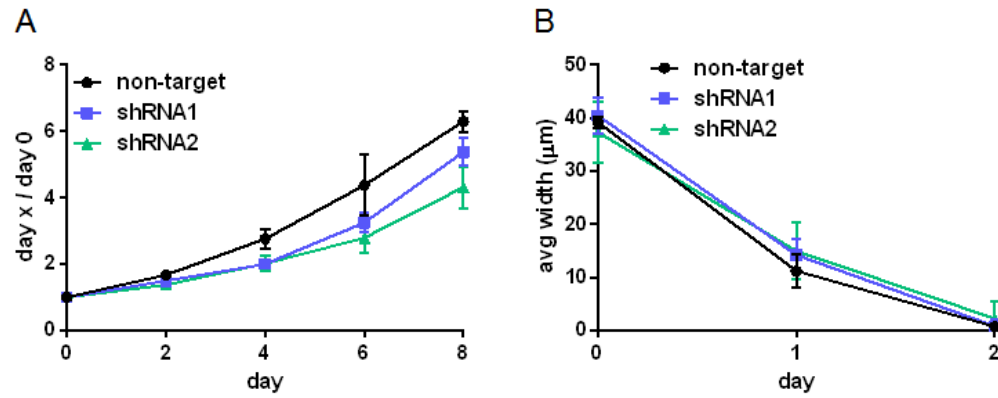

**Figure S1. LKB1 knockdown does not affect growth rate or migration of EM cells.** A) Growth curve of isogenic EM cells over an 8 day period. Values were obtained by calculating mean intensity of crystal violet staining per day normalized to day 0. B) Wound healing assay showing width of wound ( $\mu\text{m}$ ) over time. Error bars=S.E.M.

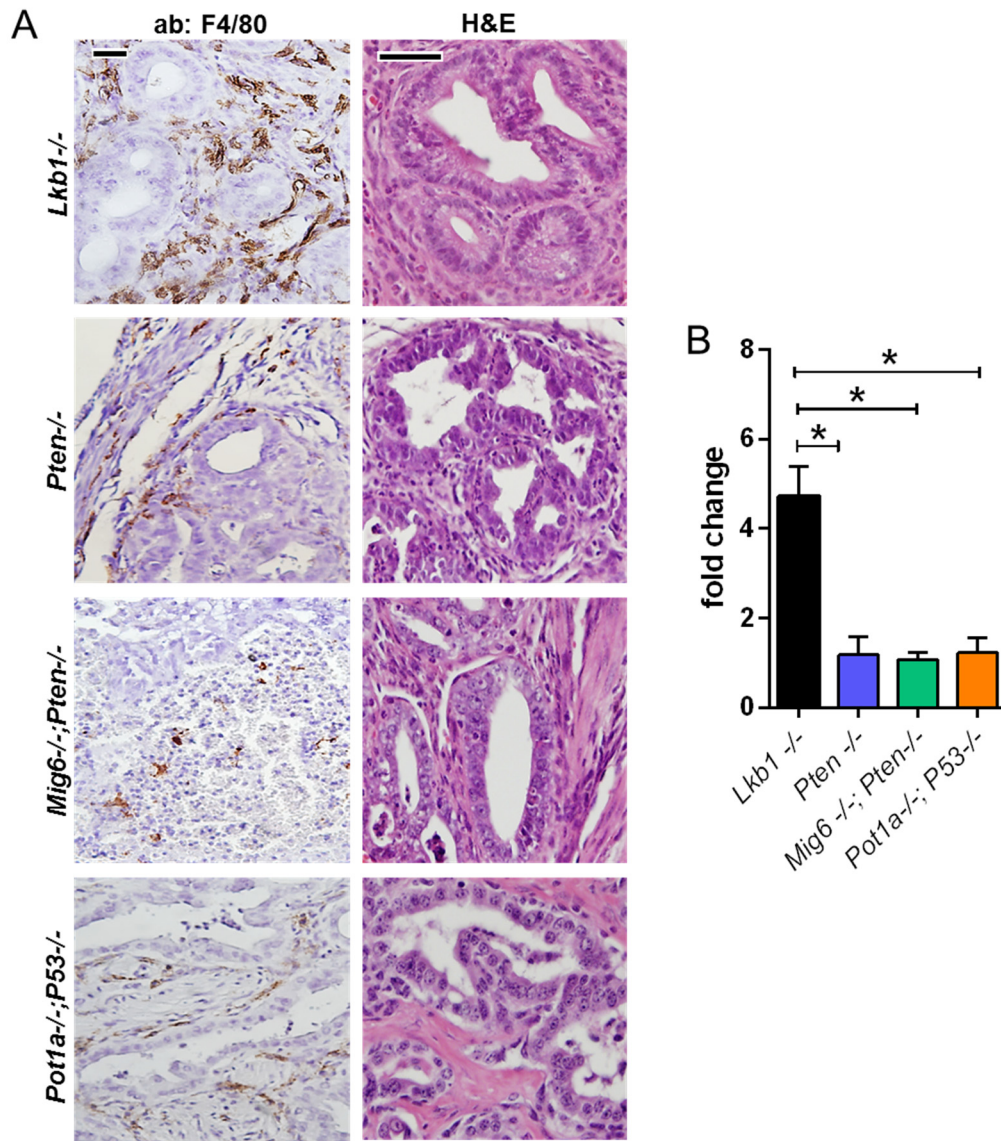

**Figure S2. Macrophage infiltration distinguishes *Lkb1*-based from other murine endometrial cancer models.** A) Representative F4/80 immunostaining of four murine endometrial cancer models showing greatest macrophage density in 12 week *Lkb1*<sup>-/-</sup> tumors, with H&E stains showing invasive tumor for each model. B) Fold change in F4/80+ cells between each cancer model and respective sibling controls (n=4 per experimental group and sibling controls for every model analyzed). *Lkb1*<sup>-/-</sup> mice displayed the greatest fold change in macrophage density (\*P<0.01) per student's t test. Bars=50  $\mu$ m; panels in the same column are all at the same magnification. Error bars=S.E.M.

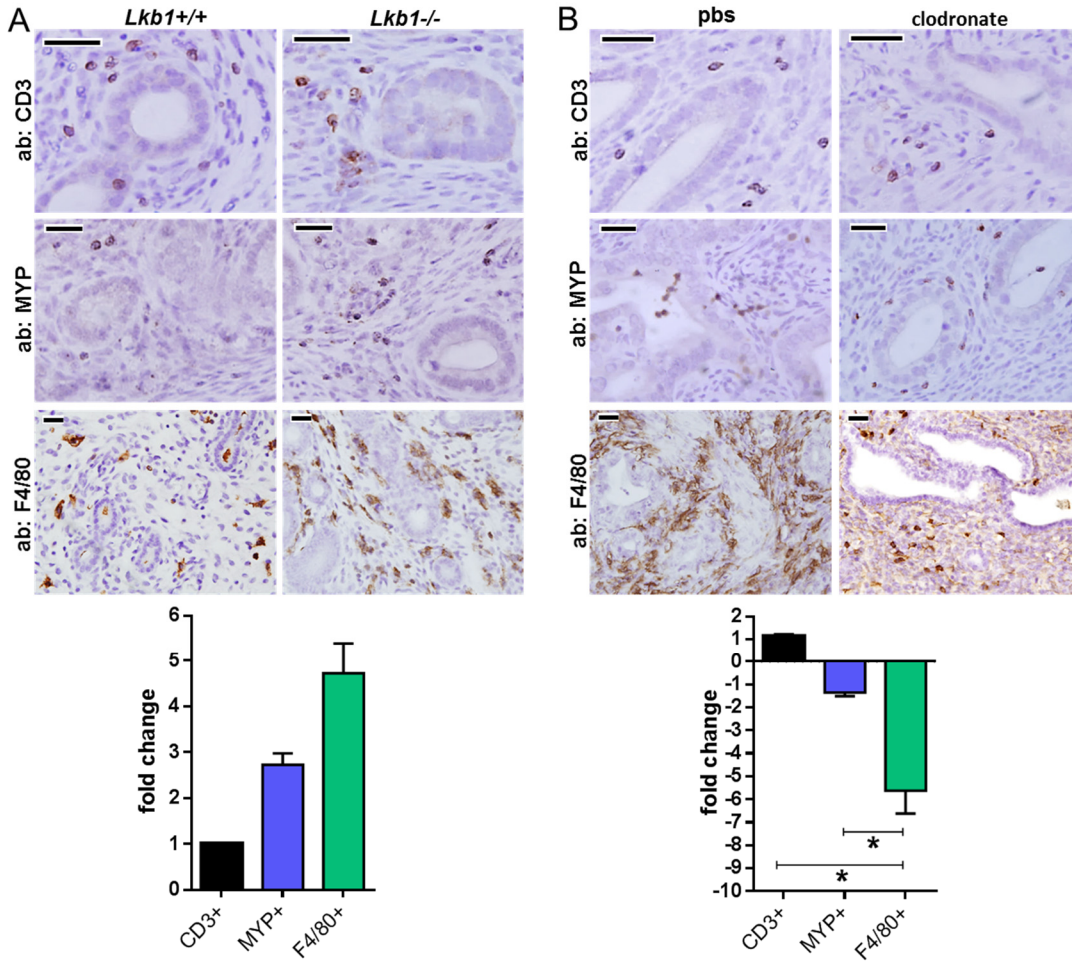

**Figure S3. Quantitation of leukocyte infiltrates in *Lkb1*<sup>-/-</sup> tumors.** A) Immunostaining of tumors with mature lymphocyte marker CD3, neutrophil marker myeloperoxidase (MYP), and macrophage marker F4/80 in 12 week-old animals. Graph shows quantitation of lymphocytes, neutrophils, and macrophages in uterine tissue sections normalized to sibling controls (n=4 for *Lkb1*<sup>+/+</sup> and n=4 *Lkb1*<sup>-/-</sup> mice). Positive cells were counted in 5 separate fields and normalized by total area for every mouse analyzed followed by fold change calculation. B) Immunostaining of CD3, MYP, and F4/80 in *Lkb1*<sup>-/-</sup> animals treated with liposomal PBS or clodronate. Graph shows quantitation of lymphocytes, neutrophils, and macrophages in clodronate treated animals normalized to controls (n=4 per treatment group). F4/80<sup>+</sup> cells showed significantly greater depletion following clodronate treatment than neutrophils and lymphocytes (\*P<0.05 per student's t test). Bars=50  $\mu$ m in all panels. Error bars=S.E.M.

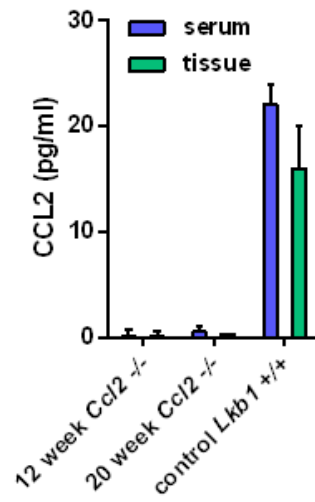

**Figure S4. Validation of *Ccl2*<sup>-/-</sup> transgenic mouse line.** A) ELISA on serum and uterine tissue showing undetectable amounts of CCL2 in younger (12 week) and older (20 week) *Ccl2*<sup>-/-</sup> mice. *Lkb1*<sup>+/+</sup> mice, which are *Ccl2*<sup>+/+</sup>, served as a positive control for CCL2 detection.

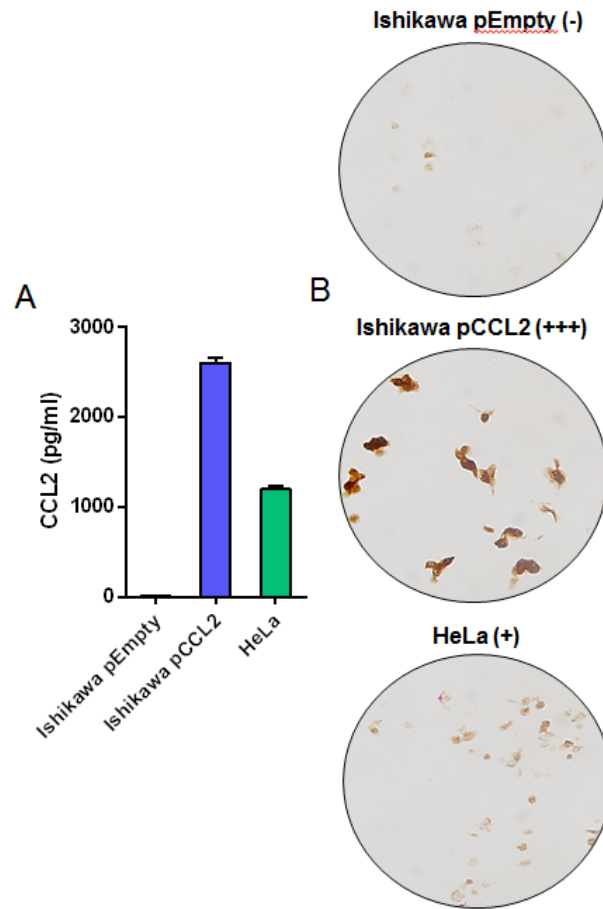

**Figure S5. Validation of human CCL2 antibody for TMA studies.** A) ELISA on media conditioned for 48h from Ishikawa endometrial cell line transfected with either empty vector or *CCL2* cDNA. HeLa cells, which were non-transfected, are also shown. As expected, cDNA transfection resulted in significantly higher levels of CCL2 in the media compared to empty vector. HeLa cells endogenously produced an intermediate level of CCL2. B) CCL2 immunostaining of cell lines following fixation in 10% buffered formalin and paraffin-embedding to simulate clinical pathology laboratory conditions.

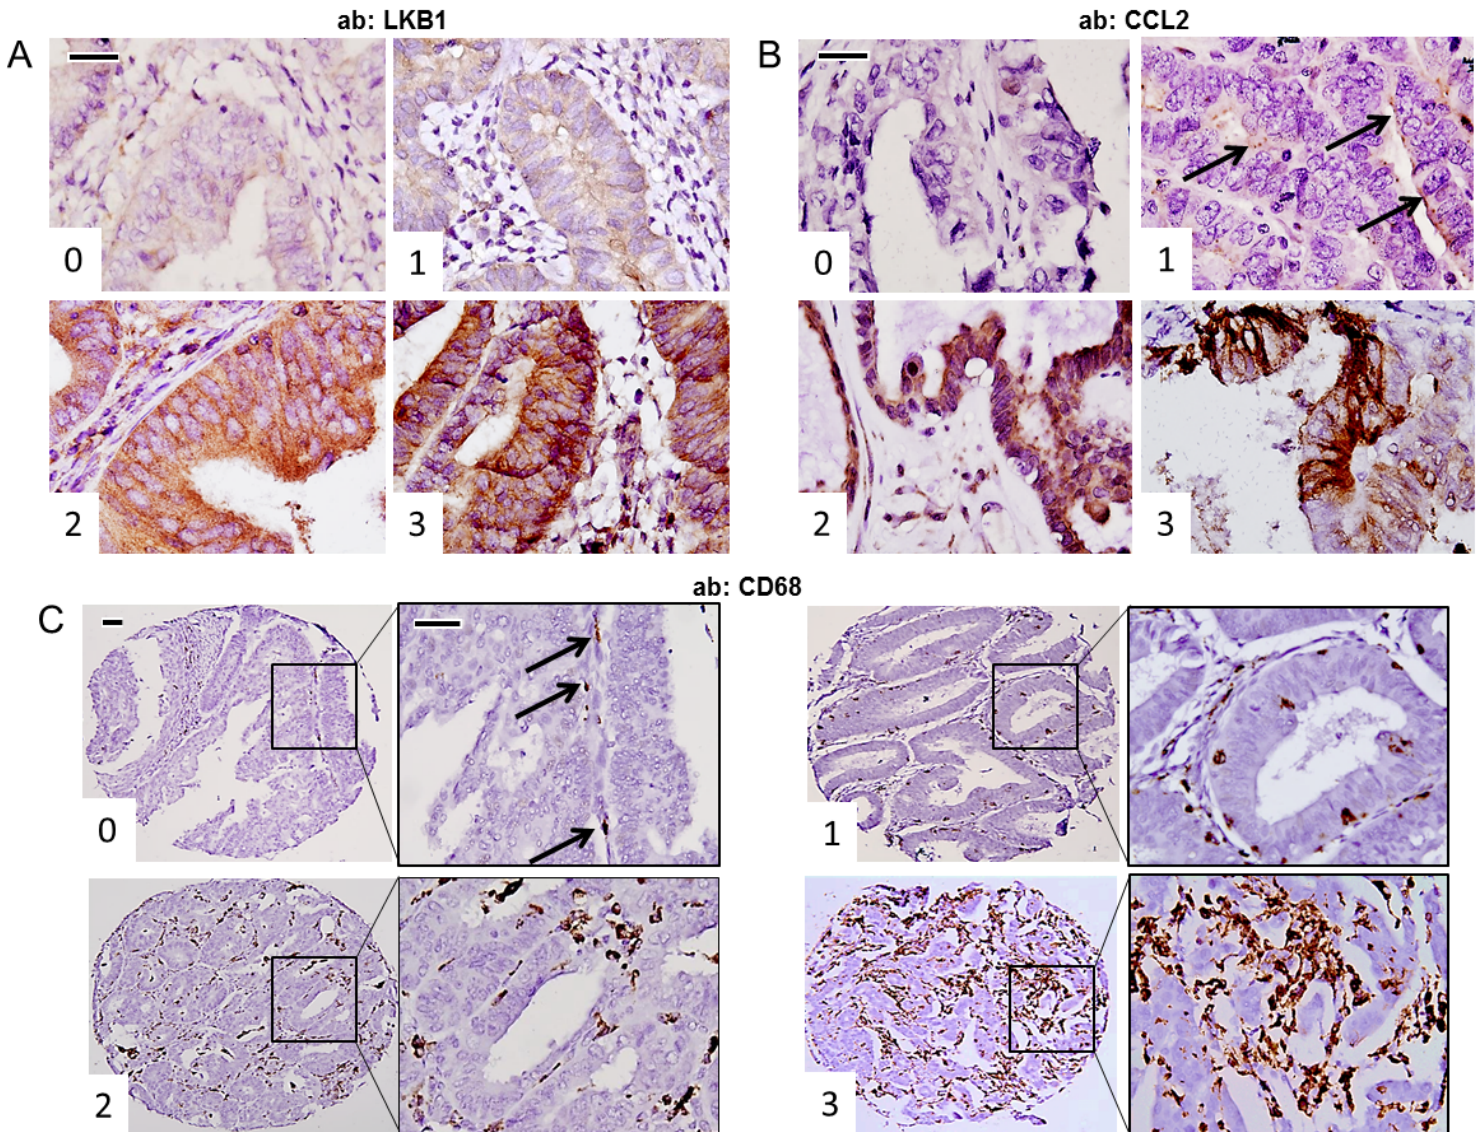

**Figure S6. Histological scoring schema for LKB1, CCL2, and CD68 expression by immunohistochemical analysis of human endometrial adenocarcinomas.** Immunohistochemical staining of A) LKB1 B) CCL2 or C) CD68 in representative cases illustrating 0-3 scoring system employed to analyze the TMA. For LKB1 and CCL2, only staining in epithelium was scored. For CD68, which was used for macrophage quantitation, staining was evaluated in the epithelial and stromal compartments combined (insets show higher magnification). Arrows in panels B and C highlight positive staining. See methods section for detailed explanation of scoring schema for each marker. Bars=50  $\mu$ m in all panels.

| Receptor binding (n=29 genes) |                      |                                                                      |
|-------------------------------|----------------------|----------------------------------------------------------------------|
| P=7x10 <sup>-4</sup>          |                      |                                                                      |
| <i>Probe ID</i>               | <i>Gene notation</i> | <i>Gene name</i>                                                     |
| ILMN_1720048                  | CCL2                 | chemokine (C-C motif) ligand 2                                       |
| ILMN_2161577                  | CXCL6                | chemokine (C-X-C motif) ligand 6 (granulocyte chemotactic protein 2) |
| ILMN_2212999                  | KIF5C                | kinesin family member 5C                                             |
| ILMN_1809364                  | NTF3                 | neurotrophin 3                                                       |
| ILMN_1802653                  | EBI3                 | Epstein-Barr virus induced 3                                         |
| ILMN_1699651                  | IL6                  | interleukin 6 (interferon, beta 2)                                   |
| ILMN_1782098                  | SMO                  | smoothened, frizzled family receptor                                 |
| ILMN_1740938                  | APOE                 | apolipoprotein E                                                     |
| ILMN_2149164                  | SFRP1                | secreted frizzled-related protein 1                                  |
| ILMN_1682636                  | CXCL2                | chemokine (C-X-C motif) ligand 2                                     |
| ILMN_1681721                  | OASL                 | 2'-5'-oligoadenylate synthetase-like                                 |
| ILMN_1773352                  | CCL5                 | chemokine (C-C motif) ligand 5                                       |
| ILMN_1791679                  | DNER                 | delta/notch-like EGF repeat containing                               |
| ILMN_1752562                  | CXCL5                | chemokine (C-X-C motif) ligand 5                                     |
| ILMN_2350634                  | EFEMP1               | EGF containing fibulin-like extracellular matrix protein 1           |
| ILMN_1728478                  | CXCL16               | chemokine (C-X-C motif) ligand 16                                    |
| ILMN_1791759                  | CXCL10               | chemokine (C-X-C motif) ligand 10                                    |
| ILMN_1766914                  | MFAP4                | microfibrillar-associated protein 4                                  |
| ILMN_1691364                  | STAT1                | signal transducer and activator of transcription 1, 91kDa            |
| ILMN_2105573                  | CCL3L3               | chemokine (C-C motif) ligand 3-like 3                                |
| ILMN_1669617                  | GRB10                | growth factor receptor-bound protein 10                              |
| ILMN_2160428                  | IL1RAPL1             | interleukin 1 receptor accessory protein-like 1                      |
| ILMN_2372124                  | HNF4A                | hepatocyte nuclear factor 4, alpha                                   |
| ILMN_1745242                  | PLSCR1               | phospholipid scramblase 1                                            |
| ILMN_1785699                  | PTH1H                | parathyroid hormone-like hormone                                     |
| ILMN_1758418                  | TNFSF13B             | tumor necrosis factor (ligand) superfamily, member 13b               |
| ILMN_1672022                  | EPHA4                | EPH receptor A4                                                      |
| ILMN_2160428                  | IL1RAPL1             | interleukin 1 receptor accessory protein-like 1                      |
| ILMN_1676449                  | SLIT2                | slit homolog 2 (Drosophila)                                          |

**Table S2, Part 1. Gene ontology analysis of common LKB1 regulated transcripts.** Illumina probe ID, gene notation, and gene names are shown for two highly significant gene ontology categories (Receptor binding, n=29 genes, P=7x10<sup>-4</sup>; Extracellular region part, n=31 genes, P=7x10<sup>-6</sup>) per hypergeometric test.

| Extracellular region part (n=31 genes) |                      |                                                              |
|----------------------------------------|----------------------|--------------------------------------------------------------|
| P=7x10 <sup>-6</sup>                   |                      |                                                              |
| <i>Probe ID</i>                        | <i>Gene notation</i> | <i>Gene name</i>                                             |
| ILMN_2073758                           | MMP12                | matrix metalloproteinase 12 (macrophage elastase)            |
| ILMN_2068104                           | TFPI2                | tissue factor pathway inhibitor 2                            |
| ILMN_1720048                           | CCL2                 | chemokine (C-C motif) ligand 2                               |
| ILMN_1802653                           | EBI3                 | Epstein-Barr virus induced 3                                 |
| ILMN_2196328                           | POSTN                | periostin, osteoblast specific factor                        |
| ILMN_1805665                           | FLRT3                | fibronectin leucine rich transmembrane protein 3             |
| ILMN_1699651                           | IL6                  | interleukin 6 (interferon, beta 2)                           |
| ILMN_2132982                           | IGFBP5               | insulin-like growth factor binding protein 5                 |
| ILMN_1740938                           | APOE                 | apolipoprotein E                                             |
| ILMN_2149164                           | SFRP1                | secreted frizzled-related protein 1                          |
| ILMN_2341229                           | CD34                 | CD34 molecule                                                |
| ILMN_1676449                           | SLIT2                | slit homolog 2 (Drosophila)                                  |
| ILMN_1751375                           | ENAM                 | enamelin                                                     |
| ILMN_1711514                           | COCH                 | coagulation factor C homolog, cochlin (Limulus polyphemus)   |
| ILMN_2153495                           | WNT7B                | wingless-type MMTV integration site family, member 7B        |
| ILMN_2054019                           | ISG15                | ISG15 ubiquitin-like modifier                                |
| ILMN_1752562                           | CXCL5                | chemokine (C-X-C motif) ligand 5                             |
| ILMN_1791759                           | CXCL10               | chemokine (C-X-C motif) ligand 10                            |
| ILMN_1784459                           | MMP3                 | matrix metalloproteinase 3 (stromelysin 1, progelatinase)    |
| ILMN_1766914                           | MFAP4                | microfibrillar-associated protein 4                          |
| ILMN_1750373                           | KAL1                 | Kallmann syndrome 1 sequence                                 |
| ILMN_2105573                           | CCL3L3               | chemokine (C-C motif) ligand 3-like 3                        |
| ILMN_1785402                           | LTBP1                | latent transforming growth factor beta binding protein 1     |
| ILMN_1785699                           | PTH1H                | parathyroid hormone-like hormone                             |
| ILMN_1758418                           | TNFSF13B             | tumor necrosis factor (ligand) superfamily, member 13b       |
| ILMN_1682636                           | CXCL2                | chemokine (C-X-C motif) ligand 2                             |
| ILMN_1773352                           | CCL5                 | chemokine (C-C motif) ligand 5                               |
| ILMN_2350634                           | EFEMP1               | EGF containing fibulin-like extracellular matrix protein 1   |
| ILMN_1728478                           | CXCL16               | chemokine (C-X-C motif) ligand 16                            |
| ILMN_1670305                           | SERPINC1             | serpin peptidase inhibitor, clade G (C1 inhibitor), member 1 |
| ILMN_1805665                           | FLRT3                | fibronectin leucine rich transmembrane protein 3             |

**Table S2, Part 2. Gene ontology analysis of common LKB1 regulated transcripts.** Illumina probe ID, gene notation, and gene names are shown for two highly significant gene ontology categories (Receptor binding, n=29 genes, P=7x10<sup>-4</sup>; Extracellular region part, n=31 genes, P=7x10<sup>-6</sup>) per hypergeometric test.

| <b><u>Age</u></b>       | <b><u>(yr)</u></b> |
|-------------------------|--------------------|
| Median                  | 59                 |
| Mean                    | 58                 |
| Range                   | 24-89              |
| <b><u>Stage</u></b>     | <b><u>(%)</u></b>  |
| I (n=114)               | 65%                |
| II (n=17)               | 10%                |
| III (n=16)              | 9%                 |
| IV (n=20)               | 11%                |
| unstaged (n=8)          | 5%                 |
| <b><u>Grade</u></b>     | <b><u>(%)</u></b>  |
| I (n=71)                | 41%                |
| II (n=62)               | 35%                |
| III (n=42)              | 24%                |
| <b><u>Histology</u></b> | <b><u>(%)</u></b>  |
| Endometrioid (n=161)    | 92%                |
| other (n=14)            | 8%                 |

**Table S3. Characteristics of 175 patients in the study population.** Clinical data for patients and endometrial tumors represented in TMA. “Other” histotypes include serous and clear cell carcinoma.
